# Supplementary material for: microRNA dependent and independent deregulation of long non-coding RNAs by an oncogenic herpesvirus
Source: PLoS Pathog. 2017 Jul 17;13(7):e1006508. doi: 10.1371/journal.ppat.1006508 (PMC5531683; doi:10.1371/journal.ppat.1006508)
Supplement: S3 Table — (XLSX) [file ppat.1006508.s007.xlsx]

## Sheet: Deregulated_Cancer
List of deregulated lncRNAs identified from microarray analysis and the cancer type where their aberrant expression has been reported. Each row specifies a unique combination of lncRNA, comparison group and cancer type. Overall, 54 unique lncRNAs are reported here in this table. Sources used to identify cancer-relevance of lncRNAs are: LncRNADisease and lnc2cancer.
Gene Symbol	Comparison	Cancer Type
AC007403.1	Cluster-vs-Mock-down	NON-SMALL CELL LUNG CANCER
AC007403.1	Cluster-vs-KSHV-down	NON-SMALL CELL LUNG CANCER
AF268386	Cluster-vs-Mock-down	MALIGNANT PLEURAL MESOTHELIOMA
AF268386	KSHV-vs-Mock-down	MALIGNANT PLEURAL MESOTHELIOMA
CDKN2B-AS1	KSHV-vs-Mock-down	BASAL CELL CARCINOMA
CDKN2B-AS1	KSHV-vs-Mock-down	HEPATOCELLULAR CARCINOMA
CDKN2B-AS1	KSHV-vs-Mock-down	ACUTE LYMPHOBLASTIC LEUKEMIA
CDKN2B-AS1	KSHV-vs-Mock-down	OSTEOSARCOMA
CDKN2B-AS1	KSHV-vs-Mock-down	PROSTATE CANCER
CDKN2B-AS1	KSHV-vs-Mock-down	BREAST CANCER
CDKN2B-AS1	KSHV-vs-Mock-down	CANCER
CDKN2B-AS1	KSHV-vs-Mock-down	GLIOMA
CDKN2B-AS1	KSHV-vs-Mock-down	SEROUS OVARIAN CANCER
CDKN2B-AS1	KSHV-vs-Mock-down	NEURAL SYSTEM TUMORS SYNDROME
CDKN2B-AS1	KSHV-vs-Mock-down	MELANOMA
CDKN2B-AS1	KSHV-vs-Mock-down	NEUROFIBROMATOSIS TYPE 1
CDKN2B-AS1	KSHV-vs-Mock-down	BLADDER CANCER
CDKN2B-AS1	KSHV-vs-Mock-down	PLEXIFORM NEUROFIBROMA
CDKN2B-AS1	KSHV-vs-Mock-down	GASTRIC CANCER
CDKN2B-AS1	KSHV-vs-Mock-down	NON-SMALL CELL LUNG CANCER
CDKN2B-AS1	KSHV-vs-Mock-down	LEUKEMIA
CDKN2B-AS1	KSHV-vs-Mock-down	NASOPHARYNGEAL CARCINOMA
CDKN2B-AS1	KSHV-vs-Mock-down	ESOPHAGEAL SQUAMOUS CELL CARCINOMA
CDKN2B-AS1	KSHV-vs-Mock-down	ESOPHAGEAL SQUAMOUS CELL CANCER
CDKN2B-AS1	KSHV-vs-Mock-down	LARYNGEAL SQUAMOUS CELL CARCINOMA
CDKN2B-AS1	KSHV-vs-Mock-down	ACUTE MYELOID LEUKEMIA
CDKN2B-AS1	KSHV-vs-Mock-down	CERVICAL CANCER
CDKN2B-AS1	KSHV-vs-Mock-down	TUMOR
CDKN2B-AS1	KSHV-vs-Mock-down	HEREDITARY CUTANEOUS MALIGNANT MELANOMA
CDKN2B-AS1	KSHV-vs-Mock-down	NEUROBLASTOMA
CDKN2B-AS1	Cluster-vs-Mock-down	BASAL CELL CARCINOMA
CDKN2B-AS1	Cluster-vs-Mock-down	HEPATOCELLULAR CARCINOMA
CDKN2B-AS1	Cluster-vs-Mock-down	ACUTE LYMPHOBLASTIC LEUKEMIA
CDKN2B-AS1	Cluster-vs-Mock-down	OSTEOSARCOMA
CDKN2B-AS1	Cluster-vs-Mock-down	PROSTATE CANCER
CDKN2B-AS1	Cluster-vs-Mock-down	BREAST CANCER
CDKN2B-AS1	Cluster-vs-Mock-down	CANCER
CDKN2B-AS1	Cluster-vs-Mock-down	GLIOMA
CDKN2B-AS1	Cluster-vs-Mock-down	SEROUS OVARIAN CANCER
CDKN2B-AS1	Cluster-vs-Mock-down	NEURAL SYSTEM TUMORS SYNDROME
CDKN2B-AS1	Cluster-vs-Mock-down	MELANOMA
CDKN2B-AS1	Cluster-vs-Mock-down	NEUROFIBROMATOSIS TYPE 1
CDKN2B-AS1	Cluster-vs-Mock-down	BLADDER CANCER
CDKN2B-AS1	Cluster-vs-Mock-down	PLEXIFORM NEUROFIBROMA
CDKN2B-AS1	Cluster-vs-Mock-down	GASTRIC CANCER
CDKN2B-AS1	Cluster-vs-Mock-down	NON-SMALL CELL LUNG CANCER
CDKN2B-AS1	Cluster-vs-Mock-down	LEUKEMIA
CDKN2B-AS1	Cluster-vs-Mock-down	NASOPHARYNGEAL CARCINOMA
CDKN2B-AS1	Cluster-vs-Mock-down	ESOPHAGEAL SQUAMOUS CELL CARCINOMA
CDKN2B-AS1	Cluster-vs-Mock-down	ESOPHAGEAL SQUAMOUS CELL CANCER
CDKN2B-AS1	Cluster-vs-Mock-down	LARYNGEAL SQUAMOUS CELL CARCINOMA
CDKN2B-AS1	Cluster-vs-Mock-down	ACUTE MYELOID LEUKEMIA
CDKN2B-AS1	Cluster-vs-Mock-down	CERVICAL CANCER
CDKN2B-AS1	Cluster-vs-Mock-down	TUMOR
CDKN2B-AS1	Cluster-vs-Mock-down	HEREDITARY CUTANEOUS MALIGNANT MELANOMA
CDKN2B-AS1	Cluster-vs-Mock-down	NEUROBLASTOMA
CRNDE	KSHV-vs-Mock-down	GLIOMA
CRNDE	KSHV-vs-Mock-down	COLORECTAL CANCER
CRNDE	Cluster-vs-KSHV-up	GLIOMA
CRNDE	Cluster-vs-KSHV-up	COLORECTAL CANCER
CTA-363E6.2	Cluster-vs-Mock-down	LUNG ADENOCARCINOMA
CTC-338M12.5	Cluster-vs-Mock-up	PANCREATIC CANCER
DLEU2	Cluster-vs-Mock-down	CHRONIC LYMPHOCYTIC LEUKEMIA
DLEU2	Cluster-vs-Mock-down	MYELOMA
DLEU2	Cluster-vs-Mock-down	LYMPHOMA
DLEU2	Cluster-vs-Mock-down	LYMPHOCYTIC LEUKEMIA
DLEU2	Cluster-vs-Mock-up	CHRONIC LYMPHOCYTIC LEUKEMIA
DLEU2	Cluster-vs-Mock-up	MYELOMA
DLEU2	Cluster-vs-Mock-up	LYMPHOMA
DLEU2	Cluster-vs-Mock-up	LYMPHOCYTIC LEUKEMIA
DLEU2	KSHV-vs-Mock-up	CHRONIC LYMPHOCYTIC LEUKEMIA
DLEU2	KSHV-vs-Mock-up	MYELOMA
DLEU2	KSHV-vs-Mock-up	LYMPHOMA
DLEU2	KSHV-vs-Mock-up	LYMPHOCYTIC LEUKEMIA
DNM3OS	Cluster-vs-KSHV-down	OVARIAN CANCER
DNM3OS	Cluster-vs-Mock-down	OVARIAN CANCER
DSCAM-AS1	Cluster-vs-Mock-down	BREAST CANCER
EPB41L4A-AS1	Cluster-vs-KSHV-up	CANCER
EPB41L4A-AS1	Cluster-vs-Mock-up	CANCER
FER1L4	Cluster-vs-Mock-down	GASTRIC CANCER
FER1L4	Cluster-vs-KSHV-down	GASTRIC CANCER
FER1L4	Cluster-vs-Mock-up	GASTRIC CANCER
FOXF1-AS1	KSHV-vs-Mock-down	GASTRIC CANCER
FTX	Cluster-vs-KSHV-down	COLORECTAL CANCER
FTX	KSHV-vs-Mock-down	COLORECTAL CANCER
GAS5	Cluster-vs-Mock-up	CANCER
GAS5	Cluster-vs-Mock-up	KIDNEY CANCER
GAS5	Cluster-vs-Mock-up	OVARIAN CANCER
GAS5	Cluster-vs-Mock-up	TUMOR
GAS5	Cluster-vs-Mock-up	BREAST CANCER
GAS5	Cluster-vs-Mock-up	RENAL CELL CARCINOMA
GAS5	Cluster-vs-Mock-up	ENDOMETRIAL CARCINOMA
GAS5	Cluster-vs-Mock-up	MALIGNANT PLEURAL MESOTHELIOMA
GAS5	Cluster-vs-Mock-up	COLORECTAL CANCER
GAS5	Cluster-vs-Mock-up	BLADDER CANCER
GAS5	Cluster-vs-Mock-up	LUNG ADENOCARCINOMA
GAS5	Cluster-vs-Mock-up	MULTIPLE MYELOMA
GAS5	Cluster-vs-Mock-up	PANCREATIC CANCER
GAS5	Cluster-vs-Mock-up	GASTRIC CANCER
GAS5	Cluster-vs-Mock-up	LYMPHOMA
GAS5	Cluster-vs-Mock-up	NON-SMALL CELL LUNG CANCER
GAS5	Cluster-vs-Mock-up	CERVICAL CANCER
GAS5	Cluster-vs-Mock-up	MELANOMA
GAS5	Cluster-vs-Mock-up	PROSTATE CANCER
GAS5	Cluster-vs-Mock-up	HEPATOCELLULAR CARCINOMA
GNAS-AS1	Cluster-vs-KSHV-up	NON-SMALL CELL LUNG CANCER
GS1-5L10.1	Cluster-vs-KSHV-down	GASTRIC CANCER
GS1-5L10.1	Cluster-vs-Mock-down	GASTRIC CANCER
GUCY1B2	Cluster-vs-KSHV-down	NON-SMALL CELL LUNG CANCER
GUCY1B2	Cluster-vs-Mock-down	NON-SMALL CELL LUNG CANCER
HOTAIR	Cluster-vs-Mock-down	LUNG ADENOCARCINOMA
HOTAIR	Cluster-vs-Mock-down	SEROUS OVARIAN CANCER
HOTAIR	Cluster-vs-Mock-down	GASTRIC CANCER
HOTAIR	Cluster-vs-Mock-down	NON-SMALL CELL LUNG CANCER
HOTAIR	Cluster-vs-Mock-down	GLIOMA
HOTAIR	Cluster-vs-Mock-down	ENDOMETRIAL CARCINOMA
HOTAIR	Cluster-vs-Mock-down	NON-FUNCTIONING PITUITARY ADENOMA
HOTAIR	Cluster-vs-Mock-down	GASTROINTESTINAL CANCER
HOTAIR	Cluster-vs-Mock-down	RENAL CANCER
HOTAIR	Cluster-vs-Mock-down	COLORECTAL CANCER
HOTAIR	Cluster-vs-Mock-down	PROSTATE CANCER
HOTAIR	Cluster-vs-Mock-down	BREAST CANCER
HOTAIR	Cluster-vs-Mock-down	SMALL CELL LUNG CANCER
HOTAIR	Cluster-vs-Mock-down	HEPATOCELLUAR CARCINOMA
HOTAIR	Cluster-vs-Mock-down	PITUITARY ADENOMA
HOTAIR	Cluster-vs-Mock-down	NASOPHARYNGEAL CARCINOMA
HOTAIR	Cluster-vs-Mock-down	COLON CANCER
HOTAIR	Cluster-vs-Mock-down	GASTRIC ADENOCARCINOMA
HOTAIR	Cluster-vs-Mock-down	MULTIPLE MYELOMA
HOTAIR	Cluster-vs-Mock-down	LIVER CANCER
HOTAIR	Cluster-vs-Mock-down	PAPILLARY THYROID CARCINOMA
HOTAIR	Cluster-vs-Mock-down	LARYNGEAL SQUAMOUS CELL CARCINOMA
HOTAIR	Cluster-vs-Mock-down	CANCER
HOTAIR	Cluster-vs-Mock-down	CERVICAL CANCER
HOTAIR	Cluster-vs-Mock-down	LUNG CANCER
HOTAIR	Cluster-vs-Mock-down	EPITHELIAL OVARIAN CANCER
HOTAIR	Cluster-vs-Mock-down	ORAL SQUAMOUS CELL CARCINOMA
HOTAIR	Cluster-vs-Mock-down	GASTROINTESTINAL STROMAL TUMOR
HOTAIR	Cluster-vs-Mock-down	ESOPHAGEAL SQUAMOUS CELL CANCER
HOTAIR	Cluster-vs-Mock-down	RENAL CELL CARCINOMA
HOTAIR	Cluster-vs-Mock-down	ESOPHAGEAL SQUAMOUS CELL CARCINOMA
HOTAIR	Cluster-vs-Mock-down	ENDOMETRIAL CANCER
HOTAIR	Cluster-vs-Mock-down	GASTRIC CARDIA ADENOCARCINOMA
HOTAIR	Cluster-vs-Mock-down	PANCREATIC CANCER
HOTAIR	Cluster-vs-Mock-down	HEAD AND NECK SQUAMOUS CELL CARCINOMA
HOTAIR	Cluster-vs-Mock-down	PANCREAS CANCER
HOTAIR	Cluster-vs-Mock-down	OVARIAN CANCER
HOTAIR	Cluster-vs-Mock-down	SMALL-CELL LUNG CANCER
HOTAIR	Cluster-vs-Mock-down	TUMOR
HOTAIR	Cluster-vs-Mock-down	BLADDER CANCER
HOTAIR	Cluster-vs-Mock-down	MELANOMA
HOTAIR	Cluster-vs-Mock-down	HEPATOCELLULAR CARCINOMA
HOTAIR	Cluster-vs-Mock-down	OESOPHAGEAL SQUAMOUS CELL CARCINOMA
HOTAIR	Cluster-vs-Mock-down	ACUTE MYELOID LEUKEMIA
HOTAIR	Cluster-vs-Mock-down	GALLBLADDER CANCER
HOTAIR	Cluster-vs-Mock-down	TRIPLE-NEGATIVE BREAST CANCER
HOTAIR	Cluster-vs-Mock-down	SARCOMA
HOTAIRM1	KSHV-vs-Mock-up	PROMYELOCYTIC LEUKEMIA
HOTAIRM1	KSHV-vs-Mock-up	ACUTE PROMYELOCYTIC LEUKEMIA
HOTAIRM1	Cluster-vs-Mock-up	PROMYELOCYTIC LEUKEMIA
HOTAIRM1	Cluster-vs-Mock-up	ACUTE PROMYELOCYTIC LEUKEMIA
HOTTIP	Cluster-vs-KSHV-down	TONGUE SQUAMOUS CELL CARCINOMA
HOTTIP	Cluster-vs-KSHV-down	OSTEOSARCOMA
HOTTIP	Cluster-vs-KSHV-down	HEPATOCELLULAR CARCINOMA
HOTTIP	Cluster-vs-KSHV-down	HEPATOCELLUAR CARCINOMA
HOTTIP	Cluster-vs-KSHV-down	COLORECTAL CANCER
HOTTIP	Cluster-vs-KSHV-down	PROSTATE CANCER
HOTTIP	Cluster-vs-KSHV-down	PANCREATIC CANCER
HOTTIP	KSHV-vs-Mock-up	TONGUE SQUAMOUS CELL CARCINOMA
HOTTIP	KSHV-vs-Mock-up	OSTEOSARCOMA
HOTTIP	KSHV-vs-Mock-up	HEPATOCELLULAR CARCINOMA
HOTTIP	KSHV-vs-Mock-up	HEPATOCELLUAR CARCINOMA
HOTTIP	KSHV-vs-Mock-up	COLORECTAL CANCER
HOTTIP	KSHV-vs-Mock-up	PROSTATE CANCER
HOTTIP	KSHV-vs-Mock-up	PANCREATIC CANCER
HOXA-AS2	Cluster-vs-KSHV-down	GASTRIC CANCER
HOXD-AS1	Cluster-vs-Mock-down	NEUROBLASTOMA
HOXD-AS1	Cluster-vs-KSHV-down	NEUROBLASTOMA
HULC	Cluster-vs-Mock-down	HEPATOCELLUAR CARCINOMA
HULC	Cluster-vs-Mock-down	PROSTATE CANCER
HULC	Cluster-vs-Mock-down	HEPATOMA
HULC	Cluster-vs-Mock-down	LIVER CANCER
HULC	Cluster-vs-Mock-down	PANCREATIC CANCER
HULC	Cluster-vs-Mock-down	COLORECTAL CANCER
HULC	Cluster-vs-Mock-down	OSTEOSARCOMA
HULC	Cluster-vs-Mock-down	PAPILLARY THYROID CARCINOMA
HULC	Cluster-vs-Mock-down	GASTRIC CANCER
HULC	Cluster-vs-Mock-down	HEPATOCELLULAR CARCINOMA
LINC00152	Cluster-vs-KSHV-up	PANCREATIC CANCER
LINC00152	Cluster-vs-KSHV-up	GASTRIC CANCER
LINC00152	Cluster-vs-KSHV-up	HEPATOCELLULAR CARCINOMA
LINC00152	Cluster-vs-Mock-up	PANCREATIC CANCER
LINC00152	Cluster-vs-Mock-up	GASTRIC CANCER
LINC00152	Cluster-vs-Mock-up	HEPATOCELLULAR CARCINOMA
LINC00467	KSHV-vs-Mock-up	NEUROBLASTOMA
LOC100128881	KSHV-vs-Mock-up	OVARIAN CANCER
LOC100128881	Cluster-vs-Mock-up	OVARIAN CANCER
LOC100287225	Cluster-vs-Mock-up	COLORECTAL CANCER
LOC100287225	Cluster-vs-KSHV-down	COLORECTAL CANCER
LOC100287225	Cluster-vs-KSHV-up	COLORECTAL CANCER
LOC100287225	Cluster-vs-Mock-down	COLORECTAL CANCER
MEG3	Cluster-vs-Mock-up	MENINGIOMA
MEG3	Cluster-vs-Mock-up	NEUROBLASTOMA
MEG3	Cluster-vs-Mock-up	HEPATOCELLUAR CARCINOMA
MEG3	Cluster-vs-Mock-up	PITUITARY ADENOMA
MEG3	Cluster-vs-Mock-up	BREAST CANCER
MEG3	Cluster-vs-Mock-up	PROSTATE CANCER
MEG3	Cluster-vs-Mock-up	GLIOMA
MEG3	Cluster-vs-Mock-up	BLADDER CANCER
MEG3	Cluster-vs-Mock-up	EPITHELIAL OVARIAN CANCER
MEG3	Cluster-vs-Mock-up	CANCER
MEG3	Cluster-vs-Mock-up	ORAL SQUAMOUS CELL CARCINOMA
MEG3	Cluster-vs-Mock-up	CERVICAL CANCER
MEG3	Cluster-vs-Mock-up	KIDNEY CANCER
MEG3	Cluster-vs-Mock-up	ACUTE MYELOID LEUKEMIA
MEG3	Cluster-vs-Mock-up	GASTRIC CANCER
MEG3	Cluster-vs-Mock-up	TONGUE SQUAMOUS CELL CARCINOMA
MEG3	Cluster-vs-Mock-up	NON-SMALL CELL LUNG CANCER
MEG3	Cluster-vs-Mock-up	LUNG CANCER
MEG3	Cluster-vs-Mock-up	COLON CANCER
MEG3	Cluster-vs-Mock-up	NON-FUNCTIONING PITUITARY ADENOMA
MEG3	Cluster-vs-Mock-up	LUNG ADENOCARCINOMA
MEG3	Cluster-vs-Mock-up	PHAEOCHROMOCYTOMA
MEG3	Cluster-vs-Mock-up	PAPILLARY THYROID CARCINOMA
MEG3	Cluster-vs-Mock-up	TUMOR
MEG3	Cluster-vs-Mock-up	NONFUNCTIONING PITUITARY ADENOMAS
MEG3	Cluster-vs-Mock-up	WILMS TUMOR
MEG3	Cluster-vs-Mock-up	COLORECTAL CANCER
MEG3	Cluster-vs-Mock-up	CHRONIC MYELOID LEUKEMIA
MEG3	Cluster-vs-Mock-up	HEPATOCELLULAR CARCINOMA
MEG3	Cluster-vs-Mock-up	CLEAR CELL RENAL CELL CARCINOMA
MEG3	Cluster-vs-KSHV-up	MENINGIOMA
MEG3	Cluster-vs-KSHV-up	NEUROBLASTOMA
MEG3	Cluster-vs-KSHV-up	HEPATOCELLUAR CARCINOMA
MEG3	Cluster-vs-KSHV-up	PITUITARY ADENOMA
MEG3	Cluster-vs-KSHV-up	BREAST CANCER
MEG3	Cluster-vs-KSHV-up	PROSTATE CANCER
MEG3	Cluster-vs-KSHV-up	GLIOMA
MEG3	Cluster-vs-KSHV-up	BLADDER CANCER
MEG3	Cluster-vs-KSHV-up	EPITHELIAL OVARIAN CANCER
MEG3	Cluster-vs-KSHV-up	CANCER
MEG3	Cluster-vs-KSHV-up	ORAL SQUAMOUS CELL CARCINOMA
MEG3	Cluster-vs-KSHV-up	CERVICAL CANCER
MEG3	Cluster-vs-KSHV-up	KIDNEY CANCER
MEG3	Cluster-vs-KSHV-up	ACUTE MYELOID LEUKEMIA
MEG3	Cluster-vs-KSHV-up	GASTRIC CANCER
MEG3	Cluster-vs-KSHV-up	TONGUE SQUAMOUS CELL CARCINOMA
MEG3	Cluster-vs-KSHV-up	NON-SMALL CELL LUNG CANCER
MEG3	Cluster-vs-KSHV-up	LUNG CANCER
MEG3	Cluster-vs-KSHV-up	COLON CANCER
MEG3	Cluster-vs-KSHV-up	NON-FUNCTIONING PITUITARY ADENOMA
MEG3	Cluster-vs-KSHV-up	LUNG ADENOCARCINOMA
MEG3	Cluster-vs-KSHV-up	PHAEOCHROMOCYTOMA
MEG3	Cluster-vs-KSHV-up	PAPILLARY THYROID CARCINOMA
MEG3	Cluster-vs-KSHV-up	TUMOR
MEG3	Cluster-vs-KSHV-up	NONFUNCTIONING PITUITARY ADENOMAS
MEG3	Cluster-vs-KSHV-up	WILMS TUMOR
MEG3	Cluster-vs-KSHV-up	COLORECTAL CANCER
MEG3	Cluster-vs-KSHV-up	CHRONIC MYELOID LEUKEMIA
MEG3	Cluster-vs-KSHV-up	HEPATOCELLULAR CARCINOMA
MEG3	Cluster-vs-KSHV-up	CLEAR CELL RENAL CELL CARCINOMA
MEG3	KSHV-vs-Mock-up	MENINGIOMA
MEG3	KSHV-vs-Mock-up	NEUROBLASTOMA
MEG3	KSHV-vs-Mock-up	HEPATOCELLUAR CARCINOMA
MEG3	KSHV-vs-Mock-up	PITUITARY ADENOMA
MEG3	KSHV-vs-Mock-up	BREAST CANCER
MEG3	KSHV-vs-Mock-up	PROSTATE CANCER
MEG3	KSHV-vs-Mock-up	GLIOMA
MEG3	KSHV-vs-Mock-up	BLADDER CANCER
MEG3	KSHV-vs-Mock-up	EPITHELIAL OVARIAN CANCER
MEG3	KSHV-vs-Mock-up	CANCER
MEG3	KSHV-vs-Mock-up	ORAL SQUAMOUS CELL CARCINOMA
MEG3	KSHV-vs-Mock-up	CERVICAL CANCER
MEG3	KSHV-vs-Mock-up	KIDNEY CANCER
MEG3	KSHV-vs-Mock-up	ACUTE MYELOID LEUKEMIA
MEG3	KSHV-vs-Mock-up	GASTRIC CANCER
MEG3	KSHV-vs-Mock-up	TONGUE SQUAMOUS CELL CARCINOMA
MEG3	KSHV-vs-Mock-up	NON-SMALL CELL LUNG CANCER
MEG3	KSHV-vs-Mock-up	LUNG CANCER
MEG3	KSHV-vs-Mock-up	COLON CANCER
MEG3	KSHV-vs-Mock-up	NON-FUNCTIONING PITUITARY ADENOMA
MEG3	KSHV-vs-Mock-up	LUNG ADENOCARCINOMA
MEG3	KSHV-vs-Mock-up	PHAEOCHROMOCYTOMA
MEG3	KSHV-vs-Mock-up	PAPILLARY THYROID CARCINOMA
MEG3	KSHV-vs-Mock-up	TUMOR
MEG3	KSHV-vs-Mock-up	NONFUNCTIONING PITUITARY ADENOMAS
MEG3	KSHV-vs-Mock-up	WILMS TUMOR
MEG3	KSHV-vs-Mock-up	COLORECTAL CANCER
MEG3	KSHV-vs-Mock-up	CHRONIC MYELOID LEUKEMIA
MEG3	KSHV-vs-Mock-up	HEPATOCELLULAR CARCINOMA
MEG3	KSHV-vs-Mock-up	CLEAR CELL RENAL CELL CARCINOMA
MIR31HG	Cluster-vs-Mock-down	BREAST CANCER
MIR31HG	Cluster-vs-Mock-down	COLORECTAL CANCER
MIR31HG	Cluster-vs-Mock-down	GASTRIC CANCER
MIR31HG	KSHV-vs-Mock-down	BREAST CANCER
MIR31HG	KSHV-vs-Mock-down	COLORECTAL CANCER
MIR31HG	KSHV-vs-Mock-down	GASTRIC CANCER
MT1DP	Cluster-vs-Mock-up	LIVER CANCER
PLAC2	Cluster-vs-Mock-up	GASTRIC CANCER
PLAC2	Cluster-vs-Mock-up	SQUAMOUS CELL CARCINOMA
PLAC2	KSHV-vs-Mock-up	GASTRIC CANCER
PLAC2	KSHV-vs-Mock-up	SQUAMOUS CELL CARCINOMA
POU5F1P1	Cluster-vs-KSHV-down	PROSTATE CANCER
PTCSC3	Cluster-vs-Mock-down	PAPILLARY THYROID CARCINOMA
PTCSC3	Cluster-vs-Mock-down	THYROID CANCER
PTCSC3	KSHV-vs-Mock-down	PAPILLARY THYROID CARCINOMA
PTCSC3	KSHV-vs-Mock-down	THYROID CANCER
RP11-304L19.5	Cluster-vs-Mock-up	HEPATOCELLULAR CARCINOMA
RP11-325I22.2	Cluster-vs-Mock-down	LUNG ADENOCARCINOMA
RP11-385J1.2	Cluster-vs-Mock-down	NON-SMALL CELL LUNG CANCER
RP11-385J1.2	Cluster-vs-KSHV-down	NON-SMALL CELL LUNG CANCER
RP11-385J1.2	KSHV-vs-Mock-down	NON-SMALL CELL LUNG CANCER
RP11-445H22.4	KSHV-vs-Mock-down	BREAST CANCER
RP11-445H22.4	Cluster-vs-KSHV-down	BREAST CANCER
RP11-445H22.4	Cluster-vs-Mock-down	BREAST CANCER
RP11-445H22.4	Cluster-vs-KSHV-up	BREAST CANCER
RP11-473M20.11	KSHV-vs-Mock-down	LUNG ADENOCARCINOMA
RP4-575N6.5	Cluster-vs-KSHV-up	LUNG ADENOCARCINOMA
RPL34-AS1	KSHV-vs-Mock-down	COLORECTAL CANCER
RPL34-AS1	KSHV-vs-Mock-down	GASTRIC CANCER
RPL34-AS1	Cluster-vs-KSHV-down	COLORECTAL CANCER
RPL34-AS1	Cluster-vs-KSHV-down	GASTRIC CANCER
RPL34-AS1	Cluster-vs-Mock-down	COLORECTAL CANCER
RPL34-AS1	Cluster-vs-Mock-down	GASTRIC CANCER
RPLP0P2	Cluster-vs-Mock-up	LUNG ADENOCARCINOMA
RPLP0P2	Cluster-vs-KSHV-up	LUNG ADENOCARCINOMA
SNHG12	Cluster-vs-Mock-up	ENDOMETRIAL CARCINOMA
SNHG3	Cluster-vs-Mock-down	HEPATOCELLULAR CARCINOMA
SNHG3	Cluster-vs-KSHV-down	HEPATOCELLULAR CARCINOMA
SOX2-OT	Cluster-vs-Mock-down	HEPATOCELLULAR CARCINOMA
SOX2-OT	Cluster-vs-Mock-down	ESOPHAGEAL SQUAMOUS CELL CARCINOMA
SOX2-OT	Cluster-vs-Mock-down	ESOPHAGEAL SQUAMOUS CELL CANCER
SOX2-OT	Cluster-vs-Mock-down	BREAST CANCER
SOX2-OT	Cluster-vs-Mock-down	LUNG SQUAMOUS CELL CARCINOMA
SOX2-OT	KSHV-vs-Mock-down	HEPATOCELLULAR CARCINOMA
SOX2-OT	KSHV-vs-Mock-down	ESOPHAGEAL SQUAMOUS CELL CARCINOMA
SOX2-OT	KSHV-vs-Mock-down	ESOPHAGEAL SQUAMOUS CELL CANCER
SOX2-OT	KSHV-vs-Mock-down	BREAST CANCER
SOX2-OT	KSHV-vs-Mock-down	LUNG SQUAMOUS CELL CARCINOMA
TDRG1	Cluster-vs-KSHV-down	TESTICULAR CANCER
TDRG1	Cluster-vs-Mock-down	TESTICULAR CANCER
TP73-AS1	Cluster-vs-Mock-up	MULTIPLE MYELOMA
TP73-AS1	Cluster-vs-Mock-up	NON-SMALL CELL LUNG CANCER
TSNAX-DISC1	KSHV-vs-Mock-down	GASTRIC CANCER
TSNAX-DISC1	Cluster-vs-Mock-down	GASTRIC CANCER
TUG1	Cluster-vs-Mock-up	BLADDER CANCER
TUG1	Cluster-vs-Mock-up	HEPATOCELLULAR CARCINOMA
TUG1	Cluster-vs-Mock-up	GLIOMA
TUG1	Cluster-vs-Mock-up	OSTEOSARCOMA
TUG1	Cluster-vs-Mock-up	NON-SMALL CELL LUNG CANCER
TUG1	Cluster-vs-Mock-up	UROTHELIAL CARCINOMA OF THE BLADDER
TUG1	Cluster-vs-Mock-up	ESOPHAGEAL SQUAMOUS CELL CARCINOMA
TUG1	Cluster-vs-Mock-up	MULTIPLE MYELOMA
UCA1	KSHV-vs-Mock-up	LUNG CANCER
UCA1	KSHV-vs-Mock-up	BREAST CANCER
UCA1	KSHV-vs-Mock-up	TONGUE SQUAMOUS CELL CARCINOMAS
UCA1	KSHV-vs-Mock-up	NON-SMALL CELL LUNG CANCER
UCA1	KSHV-vs-Mock-up	ORAL SQUAMOUS CELL CARCINOMA
UCA1	KSHV-vs-Mock-up	ACUTE MYELOID LEUKEMIA
UCA1	KSHV-vs-Mock-up	BLADDER CANCER
UCA1	KSHV-vs-Mock-up	ESOPHAGEAL SQUAMOUS CELL CARCINOMA
UCA1	KSHV-vs-Mock-up	TONGUE SQUAMOUS CELL CARCINOMA
UCA1	KSHV-vs-Mock-up	PROSTATE CANCER
UCA1	KSHV-vs-Mock-up	OVARIAN CANCER
UCA1	KSHV-vs-Mock-up	MELANOMA
UCA1	KSHV-vs-Mock-up	SQUAMOUS CARCINOMA
UCA1	KSHV-vs-Mock-up	HEPATOCELLULAR CARCINOMA
UCA1	KSHV-vs-Mock-up	TUMOR
UCA1	KSHV-vs-Mock-up	COLORECTAL CANCER
UCA1	KSHV-vs-Mock-up	GASTRIC CANCER
UCA1	KSHV-vs-Mock-up	LIVER CANCER
UCA1	Cluster-vs-Mock-up	LUNG CANCER
UCA1	Cluster-vs-Mock-up	BREAST CANCER
UCA1	Cluster-vs-Mock-up	TONGUE SQUAMOUS CELL CARCINOMAS
UCA1	Cluster-vs-Mock-up	NON-SMALL CELL LUNG CANCER
UCA1	Cluster-vs-Mock-up	ORAL SQUAMOUS CELL CARCINOMA
UCA1	Cluster-vs-Mock-up	ACUTE MYELOID LEUKEMIA
UCA1	Cluster-vs-Mock-up	BLADDER CANCER
UCA1	Cluster-vs-Mock-up	ESOPHAGEAL SQUAMOUS CELL CARCINOMA
UCA1	Cluster-vs-Mock-up	TONGUE SQUAMOUS CELL CARCINOMA
UCA1	Cluster-vs-Mock-up	PROSTATE CANCER
UCA1	Cluster-vs-Mock-up	OVARIAN CANCER
UCA1	Cluster-vs-Mock-up	MELANOMA
UCA1	Cluster-vs-Mock-up	SQUAMOUS CARCINOMA
UCA1	Cluster-vs-Mock-up	HEPATOCELLULAR CARCINOMA
UCA1	Cluster-vs-Mock-up	TUMOR
UCA1	Cluster-vs-Mock-up	COLORECTAL CANCER
UCA1	Cluster-vs-Mock-up	GASTRIC CANCER
UCA1	Cluster-vs-Mock-up	LIVER CANCER
XLOC_007697	KSHV-vs-Mock-down	PROSTATE CANCER
XLOC_007697	Cluster-vs-Mock-down	PROSTATE CANCER
XLOC_010235	Cluster-vs-Mock-up	GASTRIC CANCER
ZEB1-AS1	KSHV-vs-Mock-down	HEPATOCELLULAR CARCINOMA
ZEB1-AS1	KSHV-vs-Mock-down	ESOPHAGEAL SQUAMOUS CELL CARCINOMA
ZNF295-AS1	Cluster-vs-Mock-up	LUNG ADENOCARCINOMA
ZNFX1-AS1	Cluster-vs-KSHV-up	BREAST CANCER
ZNFX1-AS1	Cluster-vs-KSHV-up	COLORECTAL CANCER
ZNFX1-AS1	Cluster-vs-KSHV-up	DUCTAL CARCINOMA
ZNFX1-AS1	Cluster-vs-KSHV-up	HEPATOCELLULAR CARCINOMA
ZNFX1-AS1	Cluster-vs-Mock-up	BREAST CANCER
ZNFX1-AS1	Cluster-vs-Mock-up	COLORECTAL CANCER
ZNFX1-AS1	Cluster-vs-Mock-up	DUCTAL CARCINOMA
ZNFX1-AS1	Cluster-vs-Mock-up	HEPATOCELLULAR CARCINOMA
